# Supplementary material for: Co-crystals of the antiretroviral nevirapine: crystal structures, thermal analysis and dissolution behaviour
Source: Royal Society of Chemistry journal article supplement (doi:10.1039/c2ce06507j), 2011-12-23

## ESI MATERIAL

### **Manuscript: Co-crystals of the antiretroviral nevirapine: crystal structures, thermal analysis and dissolution behaviour**

Mino R. Caira,<sup>a</sup> Susan A. Bourne,<sup>a</sup> Halima Samsodien,<sup>a</sup> Emile Engel,<sup>a</sup> Wilna Liebenberg,<sup>b</sup> Nicole Stieger<sup>b</sup> and Marique Aucamp.<sup>b</sup>

<sup>a</sup>Centre for Supramolecular Chemistry Research, Department of Chemistry, University of Cape Town, Rondebosch 7701, South Africa Tel: +27 (0 )21 650 3071; Fax: +27 (0 )21-650 5195. E-mail: [Mino.Caira@uct.ac.za](mailto:Mino.Caira@uct.ac.za);

<sup>b</sup>Unit for Drug Research and Development, Faculty of Health Sciences, North-West University, Potchefstroom, South Africa.

### **Co-crystal screening - experimental details**

**Table A :** Results of co-crystal complex experiments (first series) using various methods (continuous table).

**Table B:** Results of co-crystal complex experiments (second series) using various methods (series of tables).

### **Stoichiometry determination**

(NVSC, NVTTA, NVMLE, NVGLT, NVSLI)

### **Experimental and calculated PXRD patterns**

(NVSC, NVTTA, NVMLE, NVGLT, NVSLI)

## Co-crystal screening - experimental details

**Table A : Results of co-crystal complex experiments (first series) using various methods.**

**Key to abbreviations in footnote.**

| Method 1 <sup>a</sup> : Slow evaporation (192 solvent combinations with varying ratios) |           |                      |                             |                                       |            |                     |
|-----------------------------------------------------------------------------------------|-----------|----------------------|-----------------------------|---------------------------------------|------------|---------------------|
| 1 <sup>o</sup> drug                                                                     | Co-former | Solvent              | Molar ratio<br>NV:co-former | Result                                |            |                     |
| NV                                                                                      | SC        | Acetonitrile         | 1:1                         | NV                                    |            |                     |
|                                                                                         |           | Methanol             | 1:1                         | Co-crystal NVSC ('CC1')               |            |                     |
|                                                                                         |           | Diethyl ether        | 1:1                         | CC1                                   |            |                     |
|                                                                                         |           | Ethyl acetate        | 1:1                         | NV ethyl acetate solvate              |            |                     |
|                                                                                         |           | Acetic acid          | 1:1                         | CC1                                   |            |                     |
|                                                                                         |           | Cyclohexane          | 1:1                         | CC1                                   |            |                     |
|                                                                                         |           | Dioxane              | 1:1                         | CC1                                   |            |                     |
|                                                                                         |           | n-Heptane            | 1:1                         | CC1                                   |            |                     |
|                                                                                         |           | n-Hexane             | 1:1                         | CC1                                   |            |                     |
|                                                                                         |           | Methanol             | 1:1                         | CC1                                   |            |                     |
|                                                                                         |           | Diethyl ether        | 1:1                         | CC1                                   |            |                     |
|                                                                                         |           | Chloroform           | 1:1                         | Mixture of SC and CC                  |            |                     |
|                                                                                         |           | Propan-1-ol          | 1:1                         | Sticky mass                           |            |                     |
|                                                                                         |           | Acetone              | 1:1                         | CC1                                   |            |                     |
|                                                                                         |           | Dioxane              | 1:1                         | CC1                                   |            |                     |
|                                                                                         |           | Toluene              | 1:1                         | Mixture of NV toluene solvate and CC1 |            |                     |
|                                                                                         |           |                      |                             | Pyridine                              | 1:1        | NV pyridine solvate |
|                                                                                         |           |                      |                             | Amyl alcohol                          | 1:1        | CC1                 |
|                                                                                         |           | ISNC                 | n-hexane                    | 1:1                                   | No crystal |                     |
|                                                                                         |           |                      | n-heptane                   | 1:1                                   | Mixture    |                     |
|                                                                                         |           |                      | Chloroform                  | 1:1                                   | NV         |                     |
|                                                                                         |           |                      |                             | 1:2                                   | Mixture    |                     |
|                                                                                         |           |                      | Diethyl ether               | 1:1                                   | NV         |                     |
|                                                                                         |           |                      | Dioxane                     | 1:1                                   | NV         |                     |
|                                                                                         |           |                      | Cyclohexane                 | 1:1                                   | NV         |                     |
|                                                                                         |           |                      | Acetone                     | 1:1                                   | NV         |                     |
|                                                                                         |           |                      | Propan-2-ol                 | 1:1                                   | NV hydrate |                     |
|                                                                                         |           |                      | Acetonitrile                | 1:1                                   | NV         |                     |
|                                                                                         |           |                      | Methanol                    | 1:1                                   | NV         |                     |
|                                                                                         |           |                      | Dichloromethane             | 1:2                                   | ISNC       |                     |
|                                                                                         |           | THF                  | 1:2                         | ISNC                                  |            |                     |
|                                                                                         |           | Hexane               | 1:1                         | Degraded mass                         |            |                     |
|                                                                                         |           | Carbon tetrachloride | 1:1                         | NV carbon tetrachloride solvate       |            |                     |
|                                                                                         | NC        | Methanol             | 1:1                         | NV                                    |            |                     |
|                                                                                         |           | Acetonitrile         | 1:1                         | NV                                    |            |                     |
|                                                                                         |           | Propan-2-ol          | 1:1                         | NV hydrate                            |            |                     |
|                                                                                         |           | Acetone              | 1:1                         | NV                                    |            |                     |

|          |               |     |                                           |
|----------|---------------|-----|-------------------------------------------|
|          | Chloroform    | 1:1 | NV                                        |
|          | Diethyl ether | 1:1 | NV                                        |
|          | Ethyl acetate | 1:1 | NV ethyl acetate solvate                  |
|          | Acetic acid   | 1:1 | NV                                        |
|          | Dioxane       | 1:1 | NV                                        |
|          | Cyclohexane   | 1:1 | NV                                        |
|          | n-Heptane     | 1:1 | Mixture                                   |
|          | n-Hexane      | 1:1 | NV                                        |
|          | Acetic acid   | 1:1 | NV                                        |
|          | benzene       | 1:1 | NV                                        |
|          | Carbon tet    | 1:1 | NV carbon tetrachloride solvate           |
| SUC      | Ethyl acetate | 1:1 | NV                                        |
|          | Methanol      | 1:1 | NV methanol solvate                       |
|          | Acetonitrile  | 1:1 | NV hydrate                                |
|          | Diethyl ether | 1:1 | Mixture NV and NV diethyl ether solvate   |
|          | n-Hexane      | 1:1 | Mixture                                   |
|          | n-Heptane     | 1:1 | Mixture                                   |
|          | Cyclohexane   | 1:1 | Mixture                                   |
|          | Dioxane       | 1:1 | Mixture                                   |
|          | Propanol      | 1:1 | NV                                        |
|          | Acetic acid   | 1:1 | No crystal                                |
|          | Ethyl acetate | 1:1 | NV ethyl acetate solvate                  |
|          | Ethanol       | 1:1 | NV hydrate                                |
|          | Toluene       | 1:1 | NV toluene solvate                        |
|          | Amyl alcohol  | 1;1 | NV hydrate                                |
|          | Benzene       | 1:1 | NV                                        |
|          | Carbon tet    | 1:1 | NV carbon tetrachloride solvate           |
| TTA-(DL) | Diethyl ether | 1:1 | NV diethyl ether solvate                  |
|          | Chloroform    | 1:1 | NV                                        |
|          | Acetone       | 1:1 | NV                                        |
|          | Ethyl acetate | 1:1 | NV ethyl acetate solvate                  |
|          | Acetone       | 1:1 | NV hydrate                                |
|          | Methanol      | 1:1 | NV                                        |
|          | Acetonitrile  | 1:1 | Mixture of NV hydrate and NV acetonitrile |
|          | Water         | 1:1 | NV hydrate                                |
|          | Glycerol      | 1:1 | TTA (DL)                                  |
|          | Acetic acid   | 1:1 | No crystal                                |
|          | Toluene       | 1:1 | NV toluene solvate                        |
|          | Amyl alcohol  | 1:1 | Co-crystal NVTTA ('CC 2')                 |
|          | benzene       | 1:1 | NV                                        |
| TTA-L    | Diethyl ether | 1:1 | No crystal                                |
|          | Propan-2-ol   | 1:1 | NV                                        |
|          | Acetonitrile  | 1:1 | Mixture of NV and NV hydrate              |
|          | Ethyl acetate | 1:1 | NV ethyl acetate solvate                  |
|          | Acetic acid   | 1:1 | Mixture                                   |
|          | Ethanol       | 1:1 | No crystals                               |
|          | Methanol      | 1:1 | NV methanol solvate                       |
|          | MEK           | 1:1 | Degraded                                  |
|          | chloroform    | 1:1 | NV chloroform solvate                     |

|               |               |              |                                 |                                 |
|---------------|---------------|--------------|---------------------------------|---------------------------------|
| TTA-D         | Propan-2-ol   | 1:1          | NV                              |                                 |
|               | Acetonitrile  | 1:1          | NV hydrate                      |                                 |
|               | Ethanol       | 1:1          | No crystals                     |                                 |
|               | Acetone       | 1:1          | NV                              |                                 |
|               | MEK           | 1:1          | Degraded                        |                                 |
| CAM           | Benzene       | 1;1          | NV                              |                                 |
|               | Chloroform    | 1:1          | NV                              |                                 |
|               | Propan-2-ol   | 1:1          | NV                              |                                 |
|               | Methanol      | 1:1          | NV methanol solvate             |                                 |
|               | Acetonitrile  | 1:1          | NV hydrate                      |                                 |
|               | Amyl alcohol  | 1:1          | NV                              |                                 |
|               | MEK           | 1:1          | Degraded                        |                                 |
|               | ethanol       | 1:1          | Degraded                        |                                 |
|               | Carbon tet    | 1;1          | NV carbon tetrachloride solvate |                                 |
|               | THF           | 1:1          | No crystal                      |                                 |
|               | Diethyl ether | 1:1          | No crystal                      |                                 |
|               | Propan-2-ol   | 1:1          | NV                              |                                 |
|               | Acetonitrile  | 1:1          | Mixture of NV and NV hydrate    |                                 |
|               | Ethyl acetate | 1:1          | NV ethyl acetate solvate        |                                 |
|               | Acetic acid   | 1:1          | Mixture                         |                                 |
|               | Ethanol       | 1:1          | No crystals                     |                                 |
|               | Methanol      | 1:1          | NV methanol solvate             |                                 |
|               | MEK           | 1:1          | Degraded                        |                                 |
|               | chloroform    | 1:1          | NV chloroform solvate           |                                 |
|               | Stearic acid  | Amyl alcohol | 1:1                             | NV amyl alcohol solvate         |
| MEK           |               | 1:1          | No crystal                      |                                 |
| Carbon tet    |               | 1;1          | NV carbon tetrachloride solvate |                                 |
| Diethyl ether |               | 1:1          | No crystal                      |                                 |
| Propan-2-ol   |               | 1:1          | NV                              |                                 |
| Acetonitrile  |               | 1:1          | Mixture of NV and NV hydrate    |                                 |
| Ethyl acetate |               | 1:1          | NV ethyl acetate solvate        |                                 |
| Acetic acid   |               | 1:1          | Mixture                         |                                 |
| Ethanol       |               | 1:1          | No crystals                     |                                 |
| Methanol      |               | 1:1          | NV methanol solvate             |                                 |
| MEK           |               | 1:1          | Degraded                        |                                 |
| chloroform    |               | 1:1          | NV chloroform solvate           |                                 |
| Oxalic acid   |               | Amyl alcohol | 1:1                             | NV                              |
|               |               | MEK          | 1:1                             | Degraded                        |
|               |               | Carbon tet   | 1;1                             | NV carbon tetrachloride solvate |
|               | Diethyl ether | 1:1          | No crystal                      |                                 |
|               | Propan-2-ol   | 1:1          | NV                              |                                 |
|               | Acetonitrile  | 1:1          | Mixture of NV and NV hydrate    |                                 |
|               | Ethyl acetate | 1:1          | NV ethyl acetate solvate        |                                 |
|               | Acetic acid   | 1:1          | Mixture                         |                                 |
|               | Ethanol       | 1:1          | No crystals                     |                                 |
|               | Methanol      | 1:1          | NV methanol solvate             |                                 |
|               | MEK           | 1:1          | Degraded                        |                                 |
|               | chloroform    | 1:1          | NV chloroform solvate           |                                 |
|               | Maleic acid   | Amyl alcohol | 1:1                             | NV                              |
|               |               | MEK          | 1:1                             | Degraded                        |
|               |               | Carbon tet   | 1;1                             | NV carbon tetrachloride solvate |

|               |               |     |                              |
|---------------|---------------|-----|------------------------------|
|               | Diethyl ether | 1:1 | No crystal                   |
|               | Propan-2-ol   | 1:1 | NV                           |
|               | Acetonitrile  | 1:1 | Mixture of NV and NV hydrate |
|               | Ethyl acetate | 1:1 | NV ethyl acetate solvate     |
|               | Acetic acid   | 1:1 | Mixture                      |
|               | Ethanol       | 1:1 | No crystals                  |
|               | Methanol      | 1:1 | NV methanol solvate          |
|               | MEK           | 1:1 | Degraded                     |
|               | chloroform    | 1:1 | NV chloroform solvate        |
| Aspartic acid | Benzene       | 1:1 | NV benzene solvate           |
|               | Amyl alcohol  | 1:1 | NV                           |
|               | Diethyl ether | 1:1 | No crystal                   |
|               | Propan-2-ol   | 1:1 | NV                           |
|               | Acetonitrile  | 1:1 | Mixture of NV and NV hydrate |
|               | Ethyl acetate | 1:1 | NV ethyl acetate solvate     |
|               | Acetic acid   | 1:1 | Mixture                      |
|               | Ethanol       | 1:1 | No crystals                  |
|               | Methanol      | 1:1 | NV methanol solvate          |
|               | MEK           | 1:1 | Degraded                     |
|               | chloroform    | 1:1 | NV chloroform solvate        |

#### Method 2<sup>b</sup>: Neat grinding (manual grinding with varying ratios)

| 1° drug | Co-former  | Molar ratio<br>NV:co-former | Result  |
|---------|------------|-----------------------------|---------|
| NV      | STA        | 1:1                         | NV      |
|         | SC         | 1:1                         | Mixture |
|         |            | 2:1                         | NV      |
|         | NC         | 1:1                         | NV      |
|         | ISNC       | 1:1                         | NV      |
|         | SUC        | 1:1                         | NV      |
|         | MA         | 1:1                         | Mixture |
|         | D- & L TTA | 1:1                         | Mixture |
|         | D- TTA     | 1:1                         | Mixture |
|         | L- TTA     | 1:1                         | Mixture |
|         | OA         | 1:1                         | Mixture |

#### Method 3<sup>b</sup>: Solvent-drop grinding (manual grinding with varying ratios)

| 1° drug | Co-former | Molar ratio<br>NV:co-former | Solvent       | Result  |
|---------|-----------|-----------------------------|---------------|---------|
| NV      | SC        | 1:2                         | Ethanol       | Mixture |
|         | ASP       | 1:2                         | Ethanol       | Mixture |
|         | NC        | 1:2                         | Ethanol       | Mixture |
|         | SC        | 1:1                         | Acetonitrile  | NV      |
|         |           | 1:1                         | Methanol      | Mixture |
|         |           | 1:1                         | Diethyl ether | CC1     |
|         |           | 1:1                         | Ethyl acetate | Mixture |
|         |           | 1:1                         | Acetic acid   | CC1     |
|         |           | 1:1                         | Cyclohexane   | CC1     |
|         |           | 1:1                         | Dioxane       | CC1     |
|         |           | 1:1                         | n-Heptane     | CC1     |

|      |     |                      |                                         |
|------|-----|----------------------|-----------------------------------------|
|      | 1:1 | n-Hexane             | CC1                                     |
|      | 1:1 | Methanol             | CC1                                     |
|      | 1:1 | Diethyl ether        | CC1                                     |
|      | 1:1 | Chloroform           | Mixture of SC and CC                    |
|      | 1:1 | Propan-1-ol          | Sticky mass                             |
|      | 1:1 | Acetone              | CC1                                     |
|      | 1:1 | Dioxane              | CC1                                     |
|      | 1:1 | Toluene              | Mixture                                 |
|      | 1:1 | Pyridine             | Mixture                                 |
| ISNC | 1:1 | Amyl alcohol         | CC1                                     |
|      | 1:1 | n-hexane             | No crystal                              |
|      | 1:1 | n-heptane            | Mixture                                 |
|      | 1:1 | Chloroform           | NV                                      |
|      | 1:2 |                      | Mixture                                 |
|      | 1:1 | Diethyl ether        | NV                                      |
|      | 1:1 | Dioxane              | NV                                      |
|      | 1:1 | Cyclohexane          | NV                                      |
|      | 1:1 | Acetone              | NV                                      |
|      | 1:1 | Propan-2-ol          | Mixture                                 |
|      | 1:1 | Acetonitrile         | NV                                      |
|      | 1:1 | Methanol             | NV                                      |
|      | 1:2 | Dichloromethane      | ISNC                                    |
|      | 1:2 | THF                  | ISNC                                    |
|      | 1:1 | Hexane               | Degraded mass                           |
|      | 1:1 | Carbon tetrachloride | Mixture                                 |
| NC   | 1:1 | Methanol             | NV                                      |
|      | 1:1 | Acetonitrile         | NV                                      |
|      | 1:1 | Propan-2-ol          | NV hydrate                              |
|      | 1:1 | Acetone              | NV                                      |
|      | 1:1 | Chloroform           | NV                                      |
|      | 1:1 | Diethyl ether        | NV                                      |
|      | 1:1 | Ethyl acetate        | NV ethyl acetate solvate                |
|      | 1:1 | Acetic acid          | NV                                      |
|      | 1:1 | Dioxane              | NV                                      |
|      | 1:1 | Cyclohexane          | NV                                      |
|      | 1:1 | n-Heptane            | Mixture                                 |
|      | 1:1 | n-Hexane             | NV                                      |
|      | 1:1 | Acetic acid          | NV                                      |
|      | 1:1 | benzene              | NV                                      |
| SUC  | 1:1 | Carbon tet           | NV carbon tetrachloride solvate         |
|      | 1:1 | Ethyl acetate        | NV                                      |
|      | 1:1 | Methanol             | Mixture                                 |
|      | 1:1 | Acetonitrile         | NV hydrate                              |
|      | 1:1 | Diethyl ether        | Mixture NV and NV diethyl ether solvate |
|      | 1:1 | n-Hexane             | Mixture                                 |
|      | 1:1 | n-Heptane            | Mixture                                 |
|      | 1:1 | Cyclohexane          | Mixture                                 |
|      | 1:1 | Dioxane              | Mixture                                 |

|          |     |               |                                           |
|----------|-----|---------------|-------------------------------------------|
|          | 1:1 | Propanol      | NV                                        |
|          | 1:1 | Acetic acid   | No crystal                                |
|          | 1:1 | Ethyl acetate | NV ethyl acetate solvate                  |
|          | 1:1 | Ethanol       | NV hydrate                                |
|          | 1:1 | Toluene       | NV toluene solvate                        |
|          | 1;1 | Amyl alcohol  | NV hydrate                                |
|          | 1:1 | Benzene       | NV                                        |
|          | 1:1 | Carbon tet    | NV carbon tetrachloride solvate           |
| TTA-(DL) | 1:1 | Diethyl ether | NV diethyl ether solvate                  |
|          | 1:1 | Chloroform    | NV                                        |
|          | 1:1 | Acetone       | NV                                        |
|          | 1:1 | Ethyl acetate | NV ethyl acetate solvate                  |
|          | 1:1 | Acetone       | NV hydrate                                |
|          | 1:1 | Methanol      | NV                                        |
|          | 1:1 | Acetonitrile  | Mixture of NV hydrate and NV acetonitrile |
|          | 1:1 | Water         | NV hydrate                                |
|          | 1:1 | Glycerol      | TTA (DL)                                  |
|          | 1:1 | Acetic acid   | No crystal                                |
|          | 1:1 | Toluene       | NV toluene solvate                        |
|          | 1:1 | Amyl alcohol  | Mixture                                   |
|          | 1:1 | benzene       | NV                                        |
| TTA-L    | 1:1 | Diethyl ether | No crystal                                |
|          | 1:1 | Propan-2-ol   | NV                                        |
|          | 1:1 | Acetonitrile  | Mixture of NV and NV hydrate              |
|          | 1:1 | Ethyl acetate | NV ethyl acetate solvate                  |
|          | 1:1 | Acetic acid   | Mixture                                   |
|          | 1:1 | Ethanol       | No crystals                               |
|          | 1:1 | Methanol      | NV methanol solvate                       |
|          | 1:1 | MEK           | Degraded                                  |
|          | 1:1 | chloroform    | NV chloroform solvate                     |
| TTA-D    | 1:1 | Propan-2-ol   | NV                                        |
|          | 1:1 | Acetonitrile  | NV hydrate                                |
|          | 1:1 | Ethanol       | No crystals                               |
|          | 1:1 | Acetone       | NV                                        |
|          | 1:1 | MEK           | Degraded                                  |
|          | 1;1 | Benzene       | NV                                        |
| CAM      | 1:1 | Chloroform    | NV                                        |
|          | 1:1 | Propan-2-ol   | NV                                        |
|          | 1:1 | Methanol      | NV methanol solvate                       |
|          | 1:1 | Acetonitrile  | NV hydrate                                |
|          | 1:1 | Amyl alcohol  | NV                                        |
|          | 1:1 | MEK           | Degraded                                  |
|          | 1:1 | ethanol       | Degraded                                  |
|          | 1;1 | Carbon tet    | NV carbon tetrachloride solvate           |
|          | 1:1 | THF           | No crystal                                |
|          | 1:1 | Diethyl ether | No crystal                                |
|          | 1:1 | Propan-2-ol   | NV                                        |
|          | 1:1 | Acetonitrile  | Mixture of NV and NV hydrate              |
|          | 1:1 | Ethyl acetate | NV ethyl acetate solvate                  |
|          | 1:1 | Acetic acid   | Mixture                                   |

|               |     |               |                                 |
|---------------|-----|---------------|---------------------------------|
|               | 1:1 | Ethanol       | No crystals                     |
|               | 1:1 | Methanol      | NV methanol solvate             |
|               | 1:1 | MEK           | Degraded                        |
|               | 1:1 | chloroform    | NV chloroform solvate           |
| Stearic acid  | 1:1 | Amyl alcohol  | NV amyl alcohol solvate         |
|               | 1:1 | MEK           | No crystal                      |
|               | 1;1 | Carbon tet    | NV carbon tetrachloride solvate |
|               | 1:1 | Diethyl ether | No crystal                      |
|               | 1:1 | Propan-2-ol   | NV                              |
|               | 1:1 | Acetonitrile  | Mixture of NV and NV hydrate    |
|               | 1:1 | Ethyl acetate | NV ethyl acetate solvate        |
|               | 1:1 | Acetic acid   | Mixture                         |
|               | 1:1 | Ethanol       | No crystals                     |
|               | 1:1 | Methanol      | NV methanol solvate             |
|               | 1:1 | MEK           | Degraded                        |
|               | 1:1 | chloroform    | NV chloroform solvate           |
| Oxalic acid   | 1:1 | Amyl alcohol  | NV                              |
|               | 1:1 | MEK           | Degraded                        |
|               | 1;1 | Carbon tet    | NV carbon tetrachloride solvate |
|               | 1:1 | Diethyl ether | No crystal                      |
|               | 1:1 | Propan-2-ol   | NV                              |
|               | 1:1 | Acetonitrile  | Mixture of NV and NV hydrate    |
|               | 1:1 | Ethyl acetate | NV ethyl acetate solvate        |
|               | 1:1 | Acetic acid   | Mixture                         |
|               | 1:1 | Ethanol       | No crystals                     |
|               | 1:1 | Methanol      | NV methanol solvate             |
|               | 1:1 | MEK           | Degraded                        |
|               | 1:1 | chloroform    | NV chloroform solvate           |
| Maleic acid   | 1:1 | Amyl alcohol  | NV                              |
|               | 1:1 | MEK           | Degraded                        |
|               | 1;1 | Carbon tet    | NV carbon tetrachloride solvate |
|               | 1:1 | Diethyl ether | No crystal                      |
|               | 1:1 | Propan-2-ol   | NV                              |
|               | 1:1 | Acetonitrile  | Mixture of NV and NV hydrate    |
|               | 1:1 | Ethyl acetate | NV ethyl acetate solvate        |
|               | 1:1 | Acetic acid   | Mixture                         |
|               | 1:1 | Ethanol       | No crystals                     |
|               | 1:1 | Methanol      | NV methanol solvate             |
|               | 1:1 | MEK           | Degraded                        |
|               | 1:1 | chloroform    | NV chloroform solvate           |
| Aspartic acid | 1:1 | Benzene       | NV benzene solvate              |
|               | 1:1 | Amyl alcohol  | NV                              |
|               | 1:1 | Diethyl ether | No crystal                      |
|               | 1:1 | Propan-2-ol   | NV                              |
|               | 1:1 | Acetonitrile  | Mixture of NV and NV hydrate    |
|               | 1:1 | Ethyl acetate | NV ethyl acetate solvate        |
|               | 1:1 | Acetic acid   | Mixture                         |
|               | 1:1 | Ethanol       | No crystals                     |
|               | 1:1 | Methanol      | NV methanol solvate             |



|     |            |                       |
|-----|------------|-----------------------|
| 1:1 | MEK        | Degraded              |
| 1:1 | chloroform | NV chloroform solvate |

<sup>a</sup>Products obtained by method 1 were analysed by HSM, single crystal X-ray diffraction and PXRD to determine bulk consistency. <sup>b</sup> Products obtained by methods 2 and 3 were analysed by PXRD.

**NOTE:** Vapor diffusion was employed when crystals from slow evaporation were too small for diffraction purposes.

**NOTE:** In the table, the following abbreviations are used for simplicity: nevirapine (NV), saccharin (SC), oxalic acid (OA), tartaric acid (TTA-D, TTA-L and TTA-DL), maleic acid (MA), citric acid (CA), nicotinamide (NC), isonicotinamide (ISNC), succinic acid (SUC), L-aspartic acid (ASP) and stearic acid (STA).

**TABLE B: Results of co-crystal complex experiments (second series) using various methods**

**Dry co-grinding**

Table 1: Nevirapine dry co-grinding.

| Co-former         | Molar ratio | Method | Result           |
|-------------------|-------------|--------|------------------|
| Fumaric acid      | 1:1         | 10 min | Physical mixture |
| Glutamic acid (L) | 1:1         | 10 min | Physical mixture |
| Glutaric acid     | 1:1         | 10 min | Physical mixture |
| Malic acid (L)    | 1:1         | 10 min | Physical mixture |
| Nicotinamide      | 1:1         | 10 min | Physical mixture |
| Sorbic acid       | 1:1         | 10 min | Hit              |

**Liquid-assisted Grinding**

Table 2: Nevirapine liquid-assisted grinding.

| Co-former         | Solvent    | Molar ratio | Method | Result                   |
|-------------------|------------|-------------|--------|--------------------------|
| Adipic acid       | Chloroform | 1:1         | 10 min | Hit                      |
| Adipic acid       | Chloroform | 2:1         | 10 min | Hit                      |
| Arginine (L)      | Chloroform | 1:1         | 5 min  | Physical mixture         |
| Ascorbic acid (L) | Chloroform | 1:1         | 10 min | Physical mixture         |
| Benzamide         | Chloroform | 1:1         | 5 min  | Physical mixture         |
| Cinnamamide       | Chloroform | 1:1         | 5 min  | Physical mixture         |
| Fumaric acid      | Chloroform | 2:1         | 10 min | Hit (excess nevirapine)  |
| Fumaric acid      | Methanol   | 1:1         | 10 min | Hit                      |
| Fumaric acid      | Chloroform | 1:1         | 10 min | Hit                      |
| Fumaric acid      | Chloroform | 1:1         | 10 min | Hit                      |
| Glutamic acid (L) | Chloroform | 1:1         | 10 min | Hit                      |
| Glutaric acid     | Chloroform | 1:1         | 10 min | Hit (co-crystal)         |
| Glutaric acid     | Chloroform | 2:1         | 10 min | Hit (excess nevirapine)  |
| Glutaric acid     | Methanol   | 1:1         | 10 min | Hit (partial conversion) |
| Glycine           | Chloroform | 1:1         | 5 min  | Physical mixture         |
| Hippuric acid     | Methanol   | 1:1         | 10 min | Physical mixture         |
| Hippuric acid     | Chloroform | 1:1         | 10 min | Physical                 |

|                       |              |     |        |                  |
|-----------------------|--------------|-----|--------|------------------|
|                       |              |     |        | mixture          |
| Isonicotinamide       | Chloroform   | 1:1 | 10 min | Physical mixture |
| Maleic acid           | Chloroform   | 1:1 | 10 min | Hit (co-crystal) |
| Maleic acid           | Chloroform   | 1:3 | 15 min | Hit              |
| Malic acid (L)        | Chloroform   | 1:1 | 5 min  | Physical mixture |
| Malonic acid          | Chloroform   | 1:1 | 10 min | Hit              |
| Malonic acid          | Chloroform   | 2:1 | 10 min | Hit              |
| Nicotinamide          | Chloroform   | 1:1 | 10 min | Physical mixture |
| Nicotinic acid        | Chloroform   | 1:1 | 10 min | Physical mixture |
| Orotic acid           | Methanol     | 1:1 | 10 min | Physical mixture |
| Orotic acid           | Chloroform   | 1:1 | 10 min | Physical mixture |
| Oxalic acid dihydrate | Chloroform   | 1:1 | 10 min | Hit              |
| Piperazine            | Chloroform   | 1:1 | 5 min  | Physical mixture |
| Proline (L)           | Chloroform   | 1:1 | 5 min  | Hit              |
| Propionamide          | Chloroform   | 1:1 | 5 min  | Hit              |
| Saccharin             | Chloroform   | 1:1 | 10 min | Hit              |
| Salicylic acid        | Chloroform   | 1:1 | 10 min | Hit              |
| Salicylic acid        | Chloroform   | 2:1 | 10 min | Hit              |
| Sorbic acid           | Methanol     | 1:1 | 5 min  | Hit              |
| Sorbic acid           | Methanol     | 1:1 | 20 min | Hit              |
| Sorbic acid           | Methanol     | 2:1 | 15 min | Hit              |
| Sorbic acid           | Chloroform   | 1:1 | 10 min | Hit              |
| Suberic acid          | Chloroform   | 1:1 | 10 min | Physical mixture |
| Succinic acid         | Chloroform   | 1:1 | 10 min | Physical mixture |
| Succinic acid         | Chloroform   | 2:1 | 10 min | Physical mixture |
| Succinic acid         | Acetonitrile | 1:1 | 10 min | Physical mixture |
| Succinic acid         | Acetone      | 1:1 | 10 min | Physical mixture |
| Tartaric acid (D)     | Chloroform   | 1:1 | 5 min  | Physical mixture |
| Tartaric acid (L)     | Chloroform   | 1:1 | 5 min  | Physical mixture |
| Uracil                | Chloroform   | 1:1 | 10 min | Hit              |
| Valine (L)            | Chloroform   | 1:1 | 10 min | Physical mixture |

## STOICHIOMETRY DETERMINATION

### NVSC and NVTTA:

Microanalysis for NVSC [ $2(C_{15}H_{14}N_4O) \cdot C_7H_5NO_3S$ ] and NVTTA [ $C_{15}H_{14}N_4O \cdot C_4H_6O_6$ ]

| Co-crystal | Experimental averages (n=3) |      |       |      | Calculated |      |       |      |
|------------|-----------------------------|------|-------|------|------------|------|-------|------|
|            | %C                          | %H   | %N    | %S   | %C         | %H   | %N    | %S   |
| NVSC       | 61.73                       | 4.77 | 17.88 | 4.62 | 62.08      | 4.65 | 17.61 | 4.48 |
| NVTTA      | 54.59                       | 5.02 | 13.39 | -    | 54.80      | 4.84 | 13.46 | -    |

For **NVMLE**, **NVGLT** and **NVSLI**, stoichiometry was determined by thermogravimetric analysis which presented distinct mass losses due to the release of the respective co-formers on heating the co-crystals to their melting points. Confirmation of the stoichiometries of **NVGLT** and **NVSLI** were obtained using  $^1H$  NMR spectroscopy. The co-crystals were dissolved in deuterated solvents and their  $^1H$  NMR spectra were recorded on 400 MHz instruments [Varian-Unity 400 and Bruker AMX 400 spectrometers]. Proton integration for diagnostic signals from each co-crystal component yielded the co-crystal stoichiometries.

**NVMLE:**  $C_{15}H_{14}N_4O \cdot C_4H_4O_4$

TGA showed the decomposition of maleic acid at the co-crystal melting point. The experimentally determined mass loss of  $32.6 \pm 1.0$  % (n = 2) is in reasonable agreement with the calculated value of 30.4 % expected for 1:1 co-crystal stoichiometry.

**NVGLT:**  $C_{15}H_{14}N_4O \cdot C_5H_8O_4$

The TGA profile showed mass loss of  $31.2 \pm 1.5$  % (n = 2) at 110-195 °C, corresponding to the degradation of glutaric acid for a 1:1 co-crystal (theoretical value: 33.2 %), while the remaining mass (nevirapine) degrades directly thereafter.

#### Selected proton NMR signals used for the confirmation of the NVPGLT co-crystal stoichiometry.

| Assignment                      | $\delta$ (ppm) | Integral | Normalised integral |
|---------------------------------|----------------|----------|---------------------|
| CH (aromatic, nevirapine)       | 8.57           | 1.0*     | 1                   |
| CH (aromatic, nevirapine)       | 8.23           | 1.1      | 1                   |
| CH <sub>2</sub> (glutaric acid) | 2.01           | 2.2      | 1                   |

\*Reference integral

#### NVSLI:

The TGA profile showed a mass loss of  $20.55 \pm 0.05$  % (n = 2), corresponding with the loss of one molar equivalent of salicylic acid in a co-crystal of stoichiometric ratio 2:1. This experimental value is the same as the calculated result (20.6%).

#### Selected signals from the proton NMR spectrum of NVPSLI confirming 2:1 stoichiometry.

| Assignment                    | $\delta$ (ppm) | Integral | Normalised integral |
|-------------------------------|----------------|----------|---------------------|
| CH (aromatic, nevirapine)     | 8.49           | 2.1      | 2                   |
| CH (aromatic, salicylic acid) | 7.88           | 1.0*     | 1                   |
| CH (aromatic, salicylic acid) | 7.42           | 1.0      | 1                   |
| CH (cyclopropyl, nevirapine)  | 3.71           | 2.1      | 2                   |

\*Reference integral

## EXPERIMENTAL AND CALCULATED PXRD PATTERNS

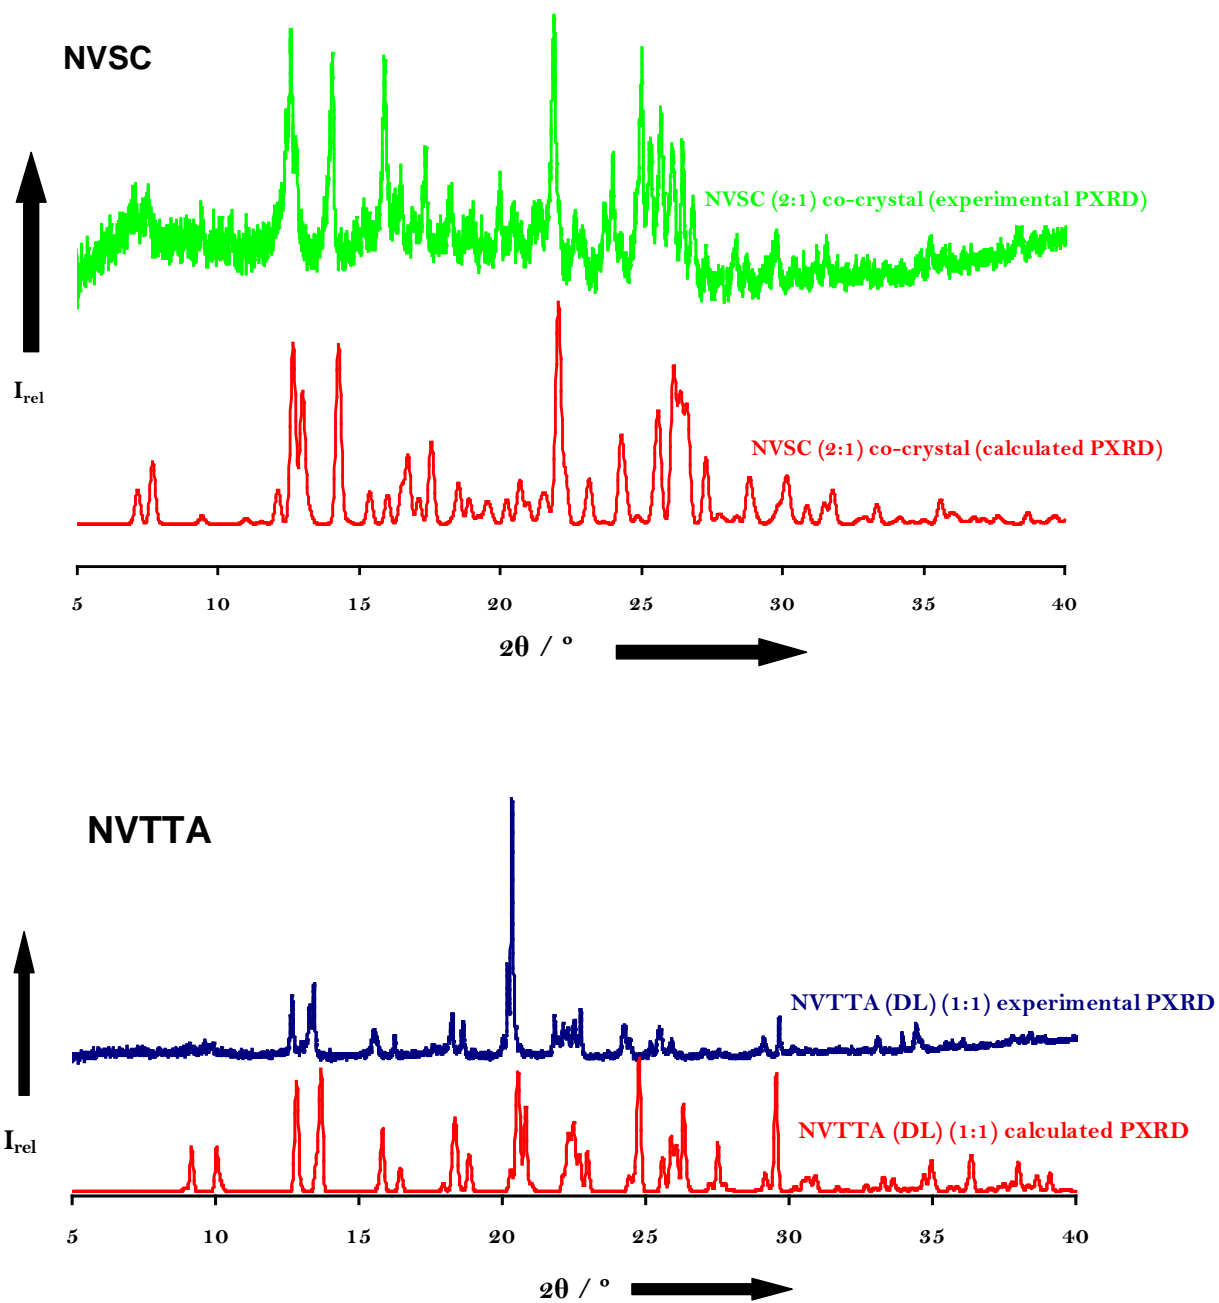

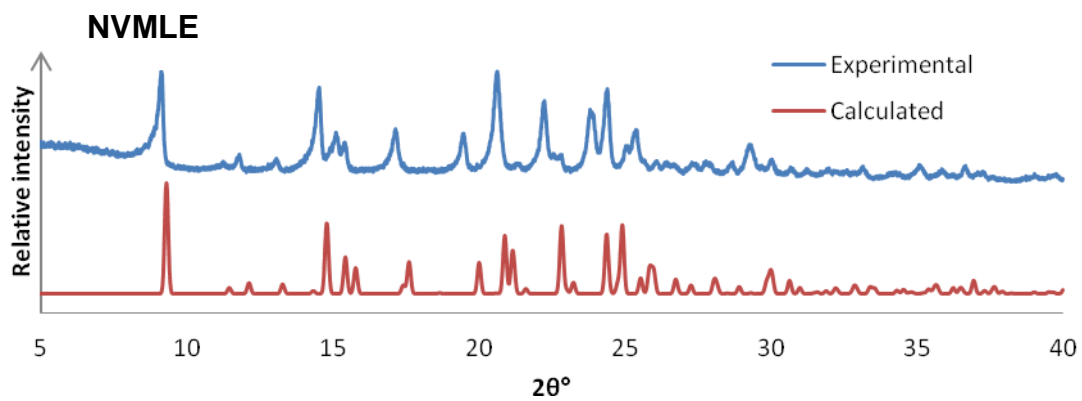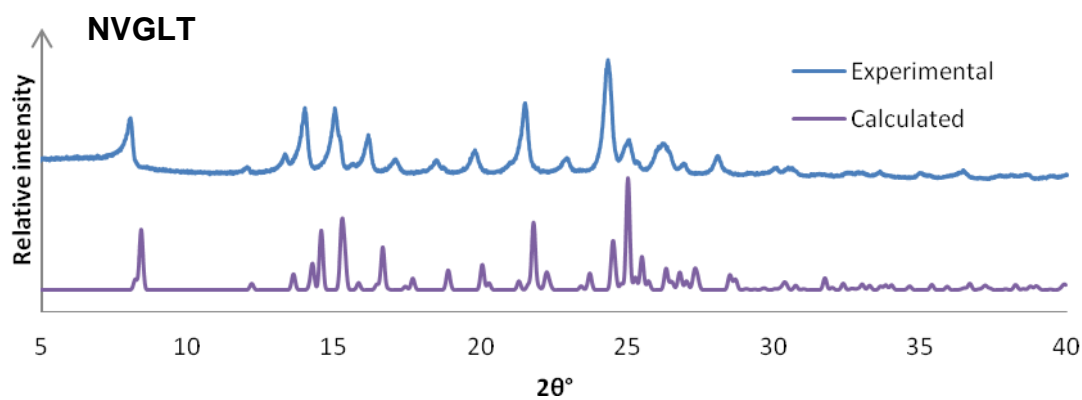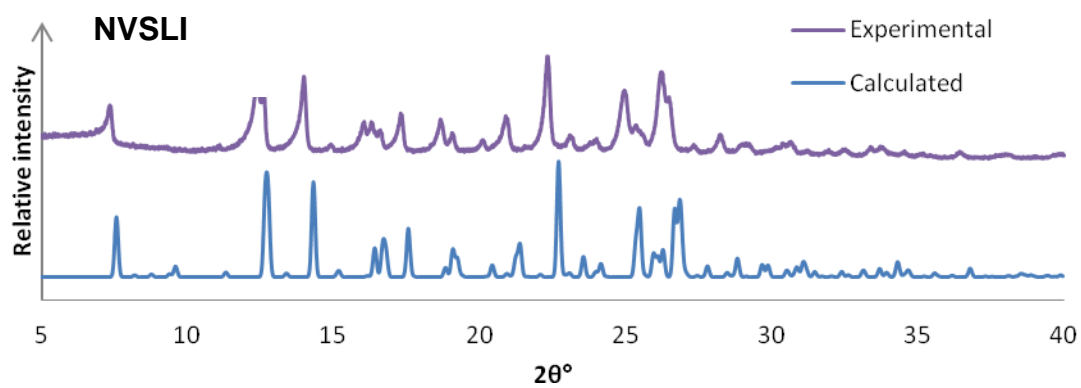

Supplement: c2ce06507j.pdf [file c2ce06507j.pdf]
